# Supplementary material for: Angled Insertion of Microneedles for Targeted Antigen Delivery to the Epidermis
Source: MDPI journal article supplement (doi:10.3390/pharmaceutics14020347), 2022-02-01
Supplement: s1 [file s1]

## Supplementary Materials: Angled Insertion of Microneedles for Targeted Antigen Delivery to the Epidermis

Rohan Murty, Abishek Sankaranarayanan, Isabella I. Bowland, Juan Mena-Lapaix and Mark R. Prausnit

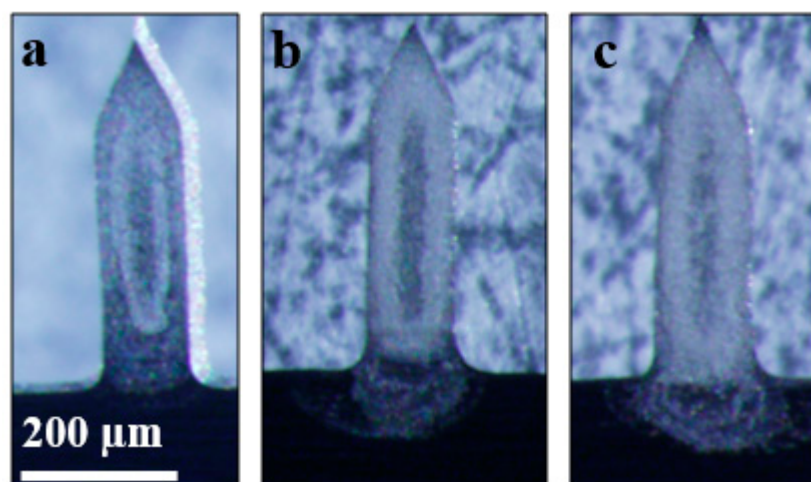

**Figure S1.** Representative images of MNs with coatings past the base of MNs. MNs measuring were coated using a formulation containing 1% (*w/v*) CMC, 0.5% (*w/v*) Pluronic F-68, 2% (*w/v*), and peanut antigen using (a) 5, (b) 10 or (c) 15 dip-coating cycles.

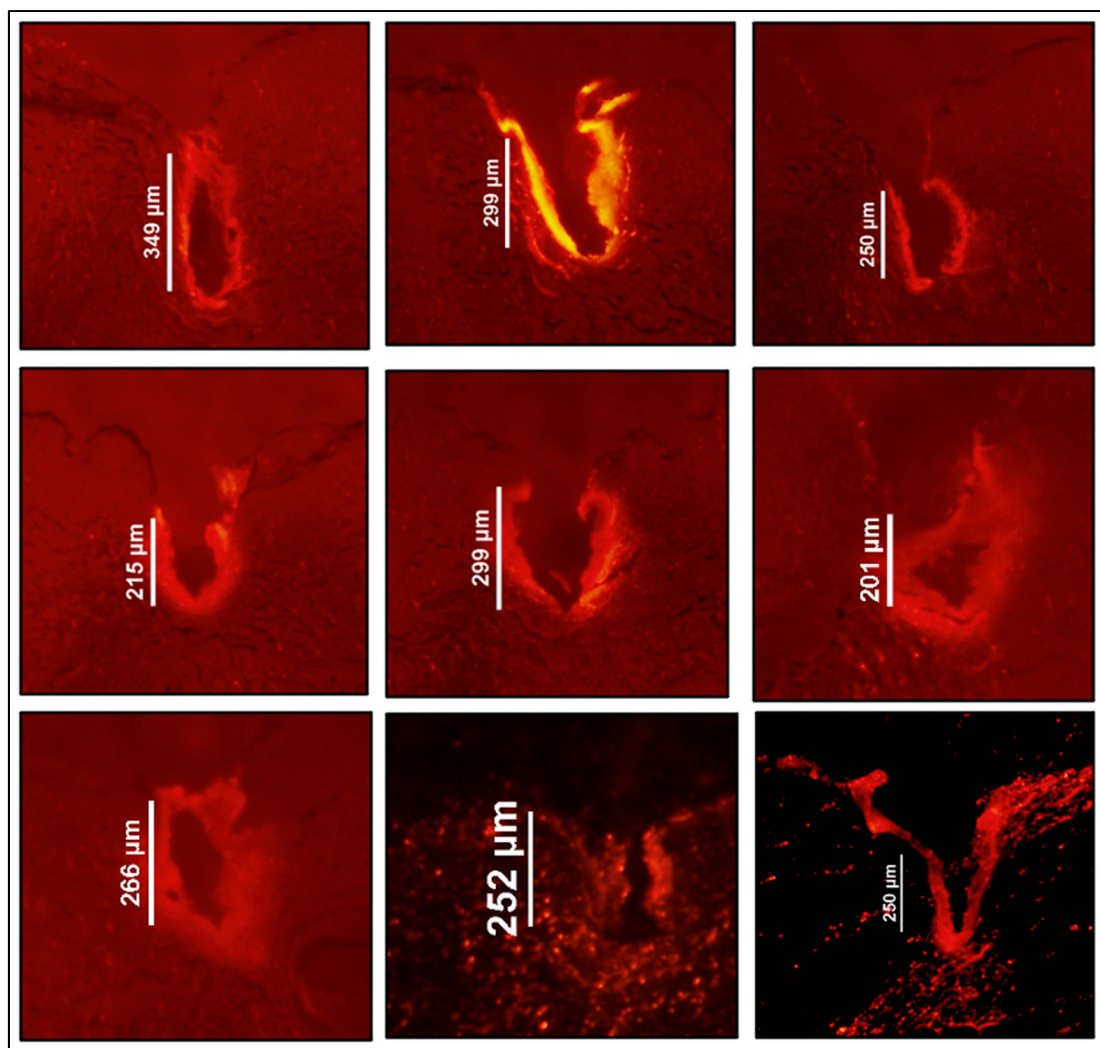

**Figure S2.** Images of histological skin sections after insertion of MNs coated with red-fluorescent sulforhodamine dye at an angle of  $90^\circ$  used to generated data presented in Figure 4.

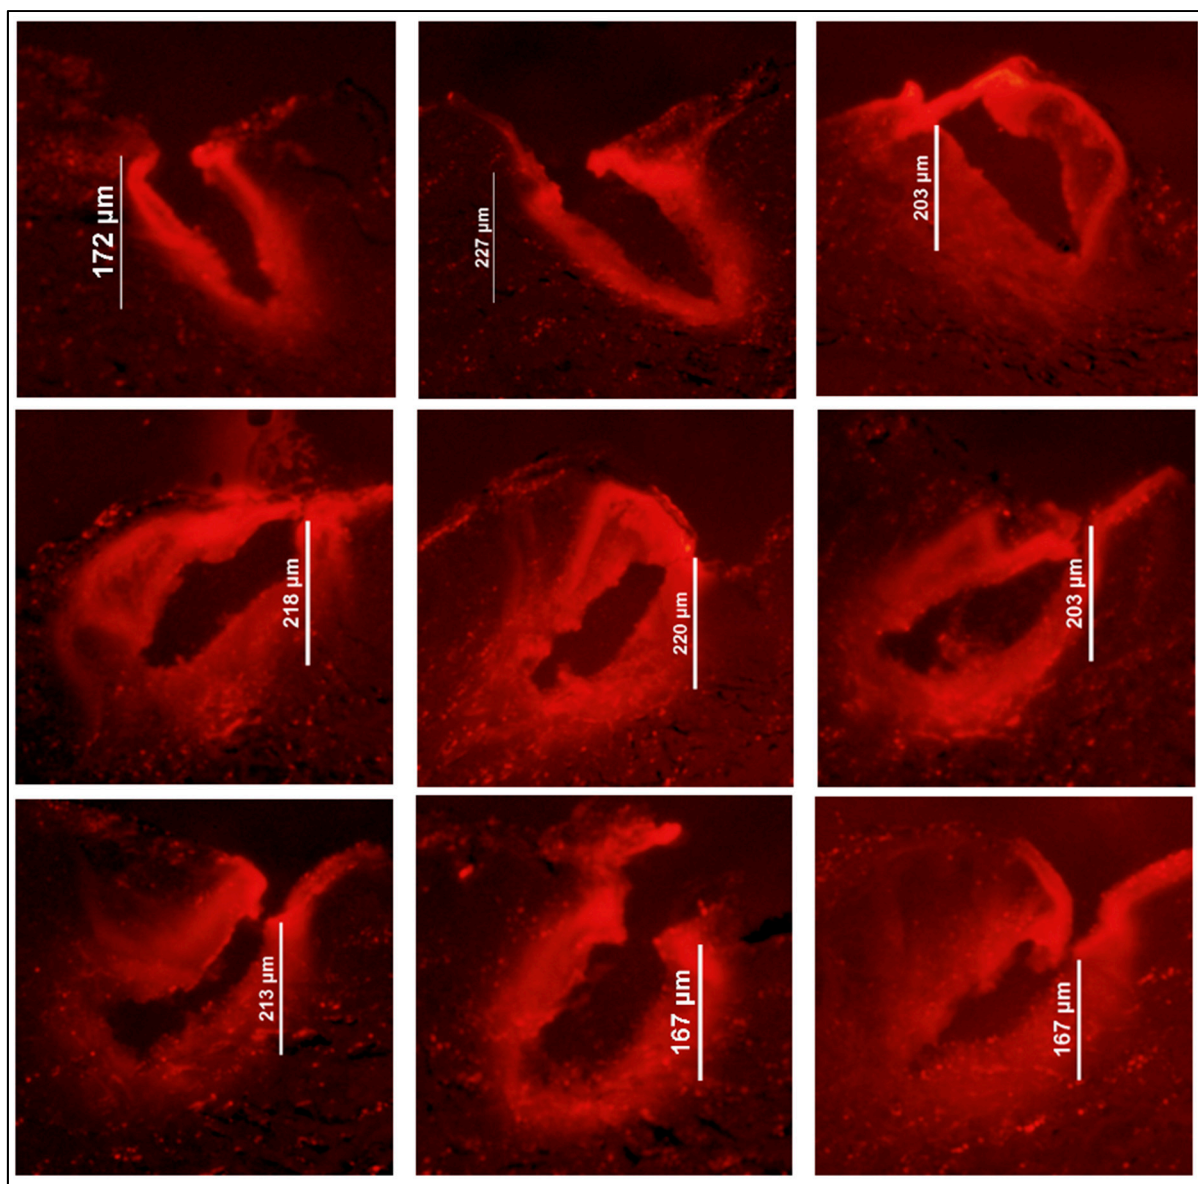

**Figure S3.** Images of histological skin sections after insertion of MNs coated with red-fluorescent sulforhodamine dye at an angle of 45° used to generated data presented in Figure 4.



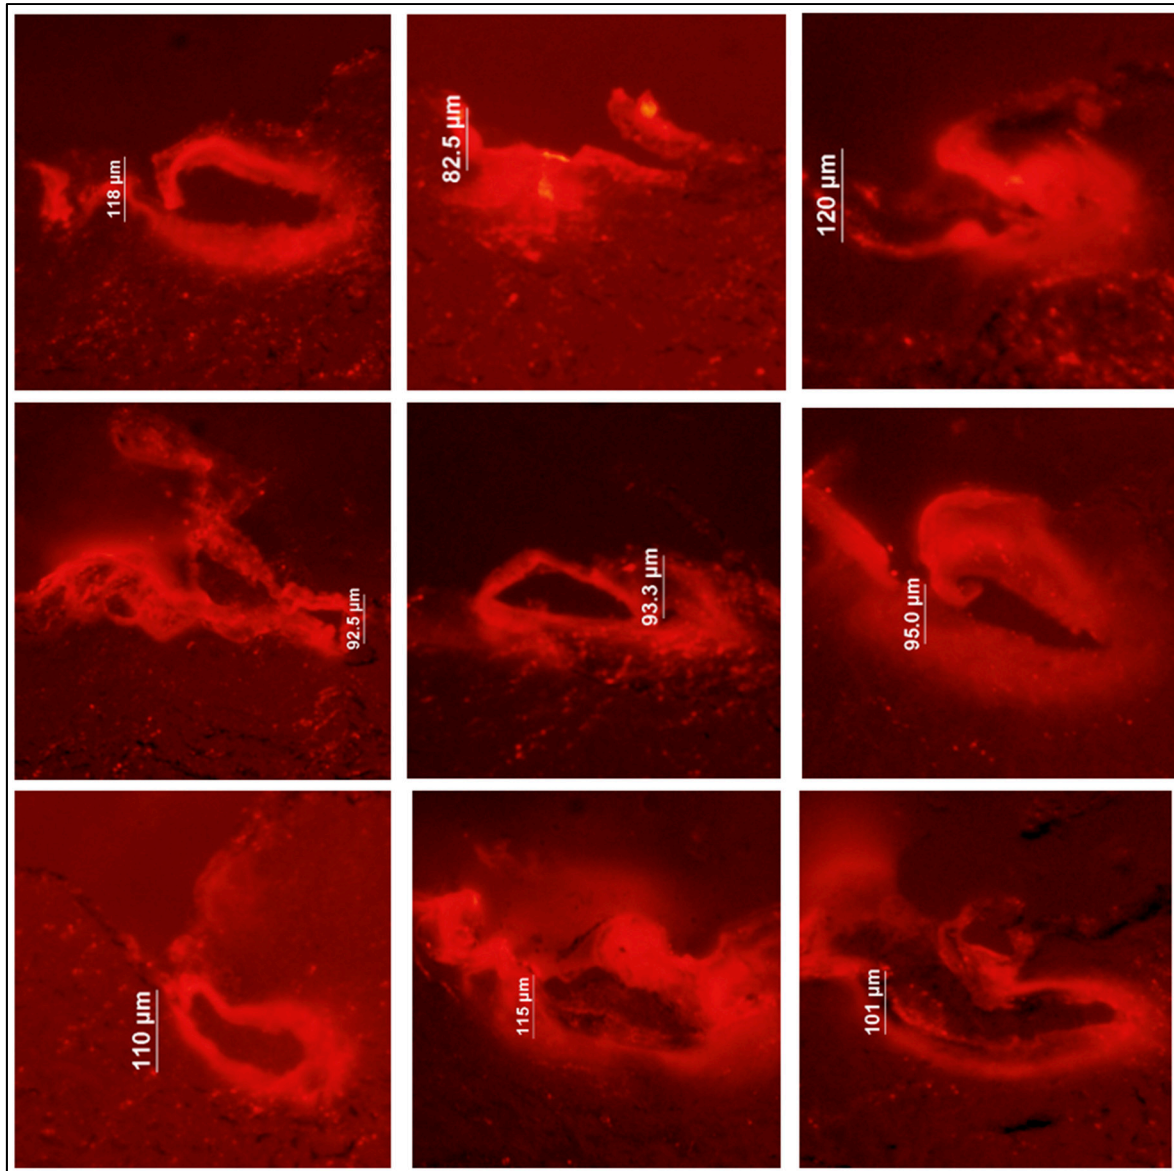

**Figure S4.** Images of histological skin sections after insertion of MNs coated with red-fluorescent sulforhodamine dye at an angle of 20° used to generated data presented in Figure 4.

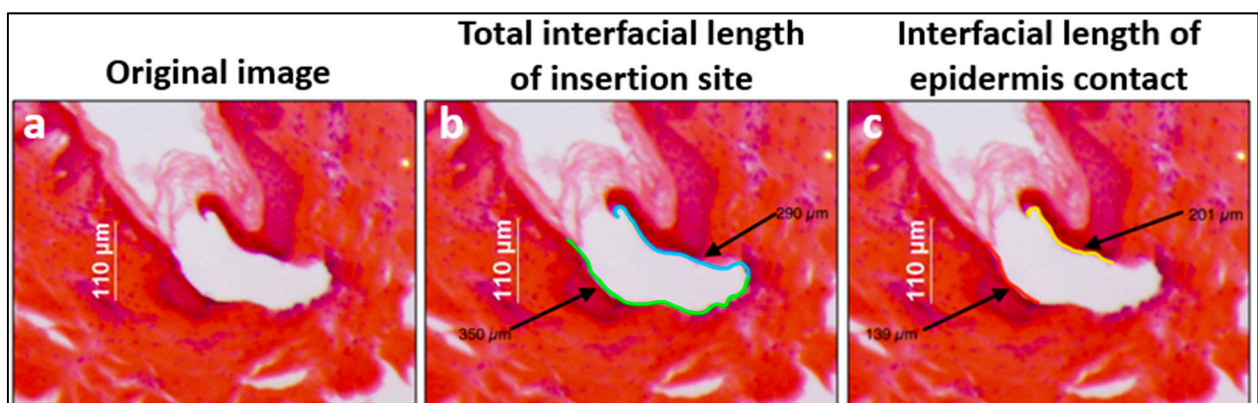

**Figure 5.** Representative H&E-stained images of 250  $\mu\text{m}$ -long MNs inserted at 20° illustrating the method to calculate epidermis percent localization: (a) original insertion site image; (b) total interfacial length of the insertion site (640  $\mu\text{m}$ ); (c) interfacial epidermis contact length of the insertion site (340  $\mu\text{m}$ ).



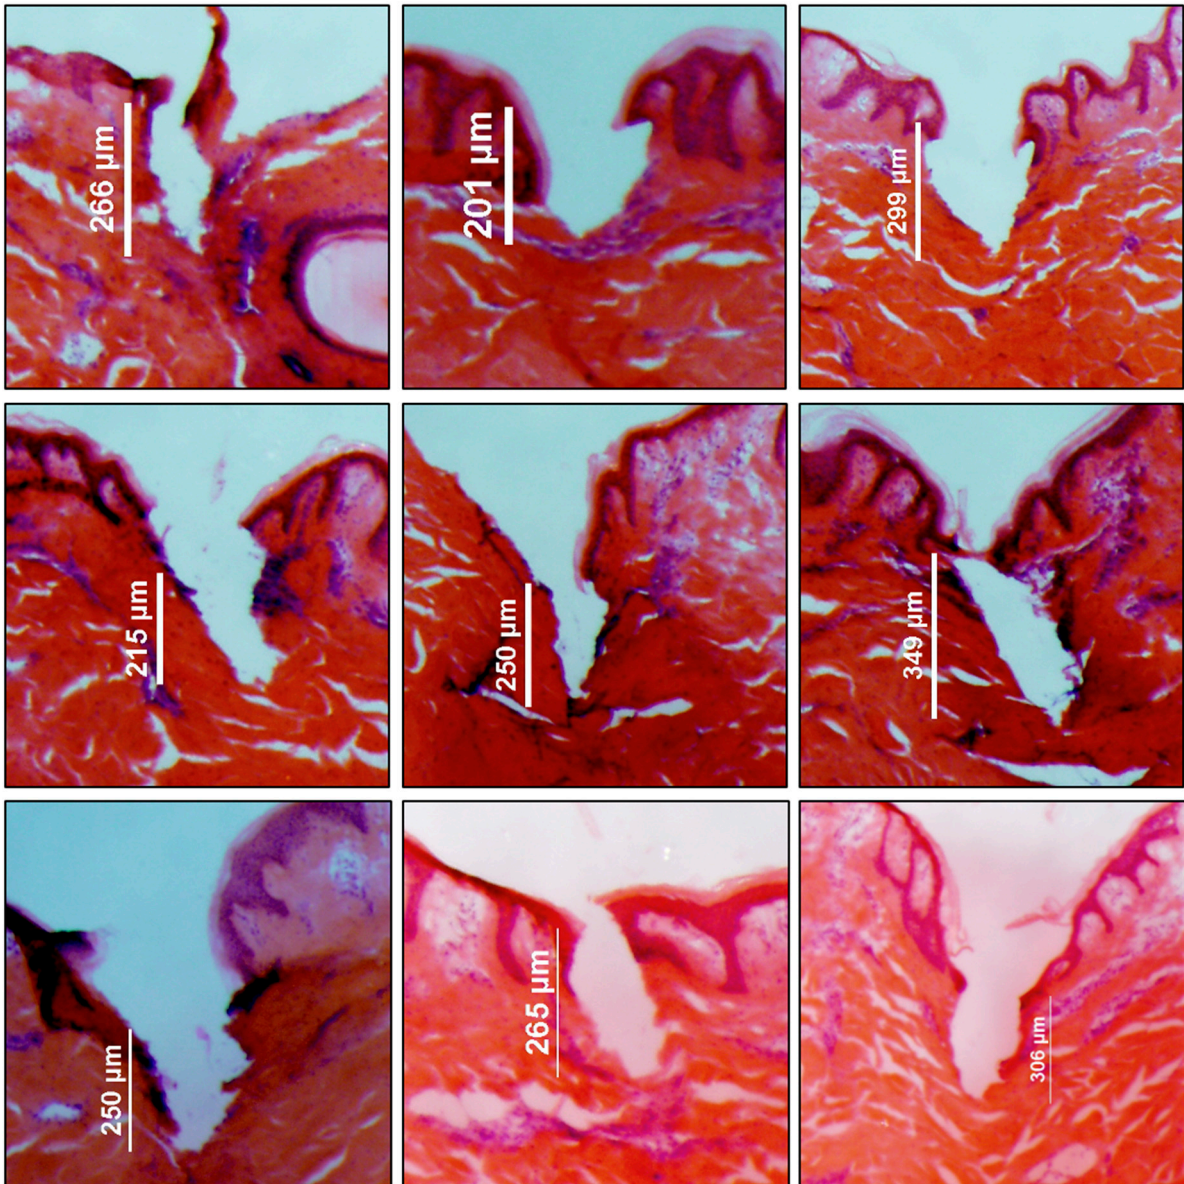

**Figure S6.** Images of histological skin sections stained with H&E after insertion of MNs at an angle of 90° used to generated data presented in Figure 5.

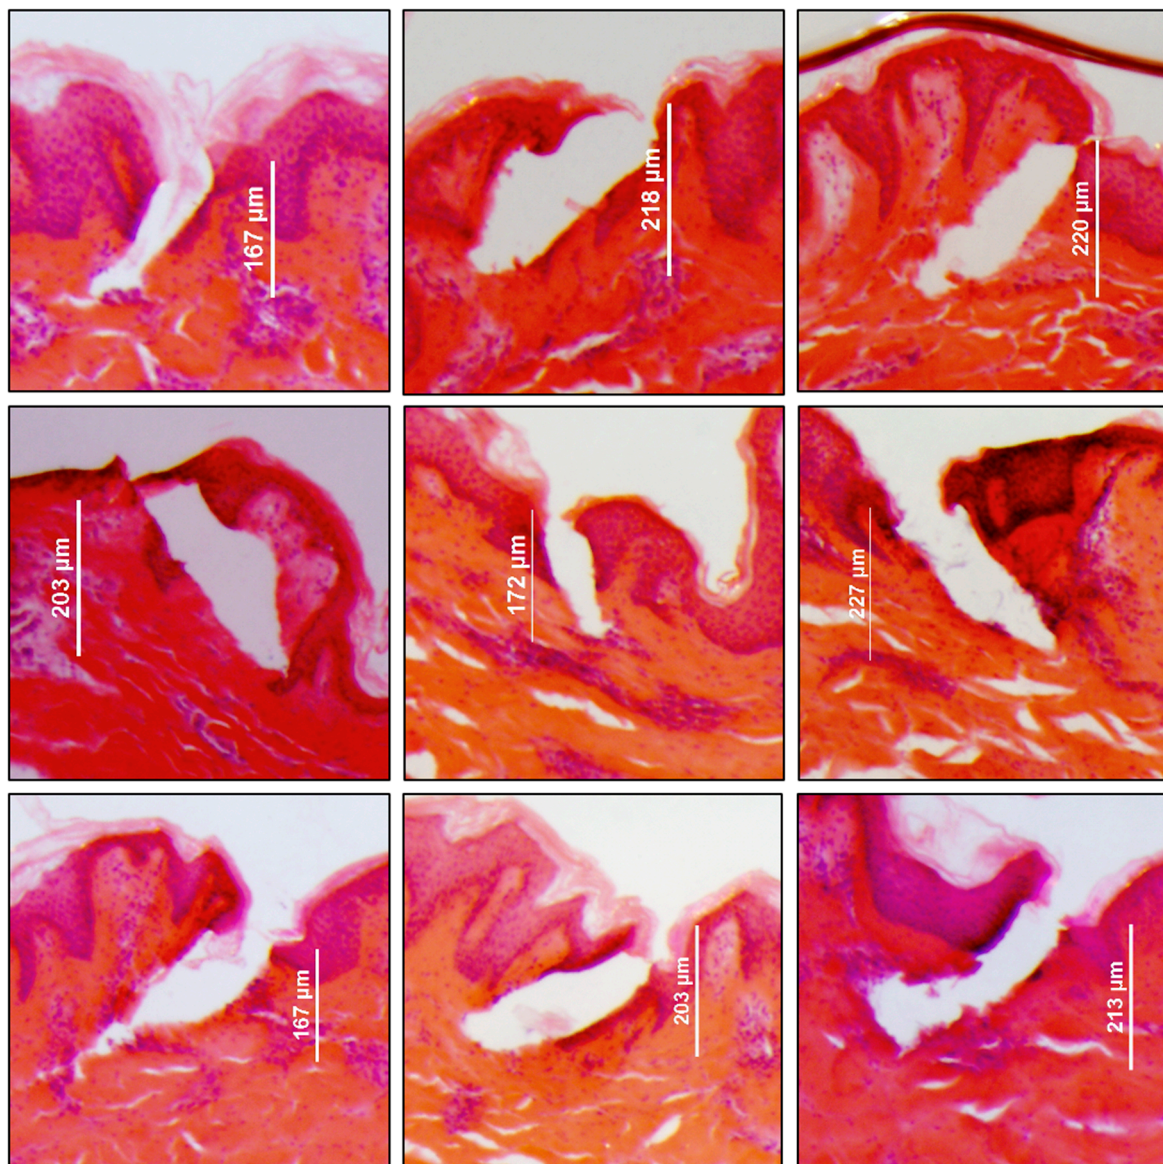

**Figure S7.** Images of histological skin sections stained with H&E after insertion of MNs at an angle of 45° used to generated data presented in Figure 5.



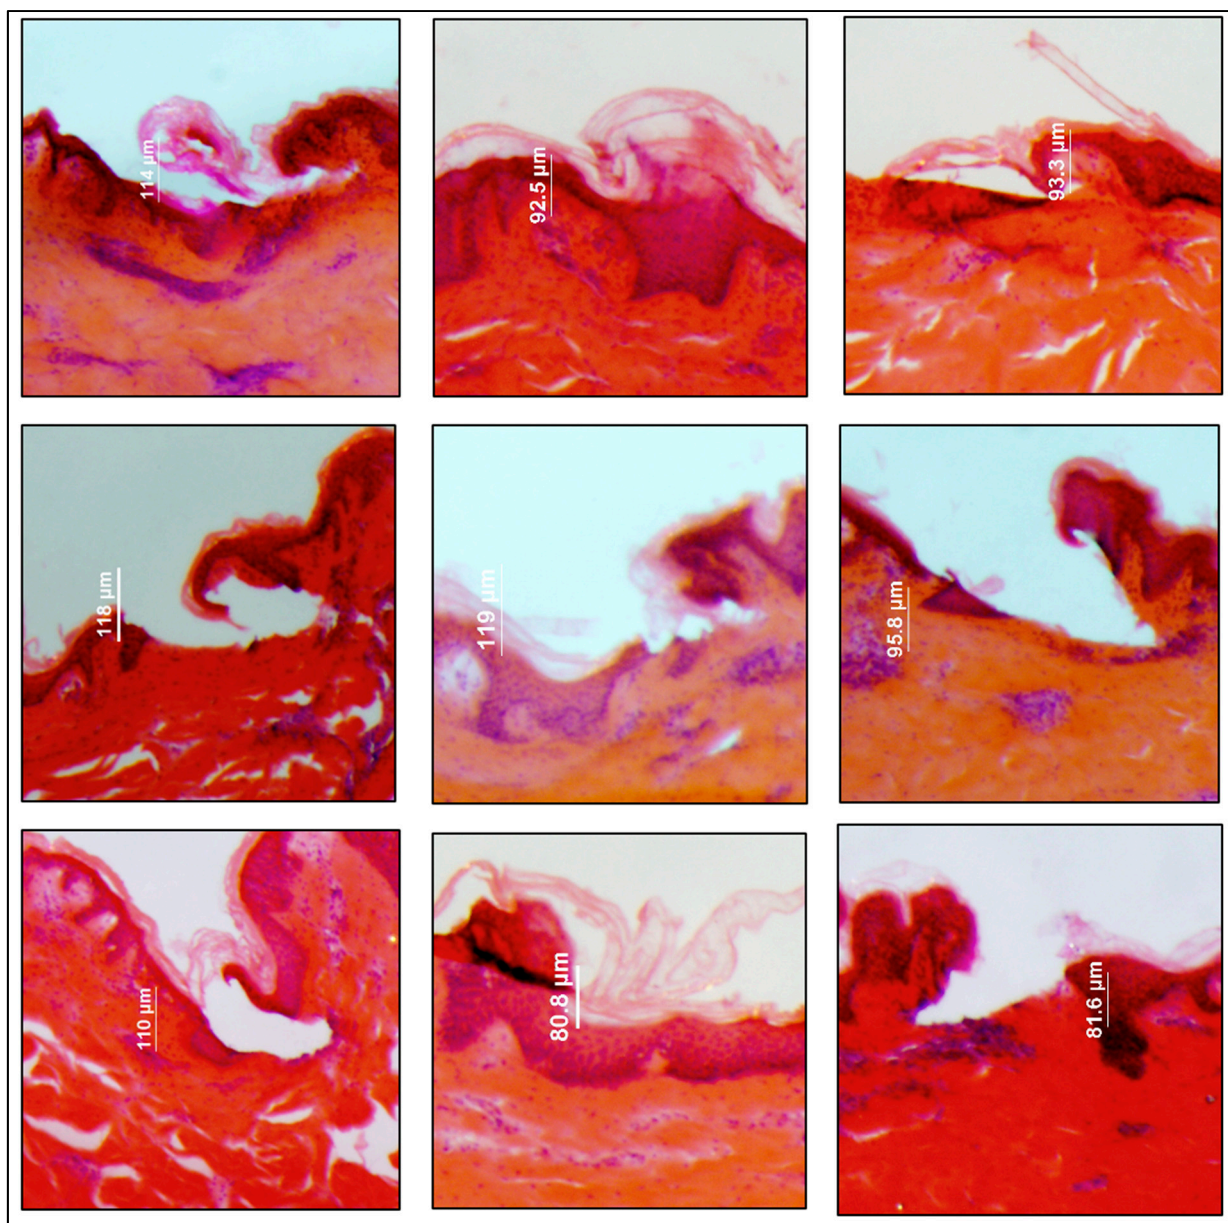

**Figure S8.** Images of histological skin sections stained with H&E after insertion of MNs at an angle of 20° used to generated data presented in Figure 5.

**Table S1.** Percent epidermal localization and associated statistics for each of the three insertion angles studied.

| Percent Epidermal Localization |       |                    |       |        |
|--------------------------------|-------|--------------------|-------|--------|
|                                |       | Angle of Insertion |       |        |
|                                |       | 90°                | 45°   | 20°    |
| Replicate                      | 1     | 16.8%              | 52.6% | 100.0% |
|                                | 2     | 39.1%              | 46.9% | 100.0% |
|                                | 3     | 25.0%              | 18.9% | 72.0%  |
|                                | 4     | 40.9%              | 34.9% | 47.5%  |
|                                | 5     | 11.9%              | 26.5% | 83.4%  |
|                                | 6     | 8.7%               | 44.0% | 61.0%  |
|                                | 7     | 18.7%              | 61.4% | 52.9%  |
|                                | 8     | 45.5%              | 44.0% | 67.3%  |
|                                | 9     | 18.4%              | 53.8% | 43.0%  |
| Statistics                     | Mean  | 25.0%              | 42.6% | 69.7%  |
|                                | StDev | 13.5%              | 13.6% | 21.2%  |
